# Supplementary material for: Highly interpenetrated diamondoid nets of Zn(ii) and Cd(ii) coordination networks from mixed ligands
Source: Royal Society of Chemistry journal article supplement (doi:10.1039/c1ce06019h), 2011-11-02

**Fig. S1.** (a) Coordination environment about the Zn center of **3**. (b) A schematic drawing showing the **mog** topology.

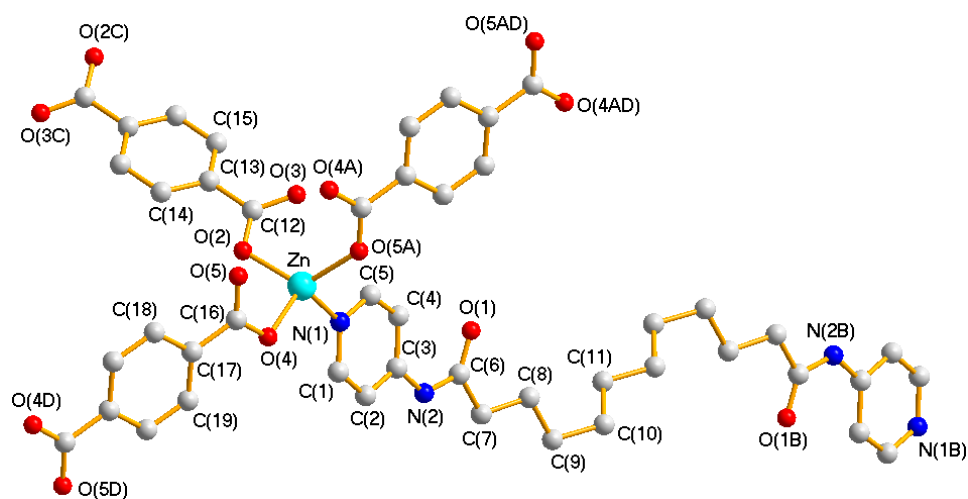

(a)

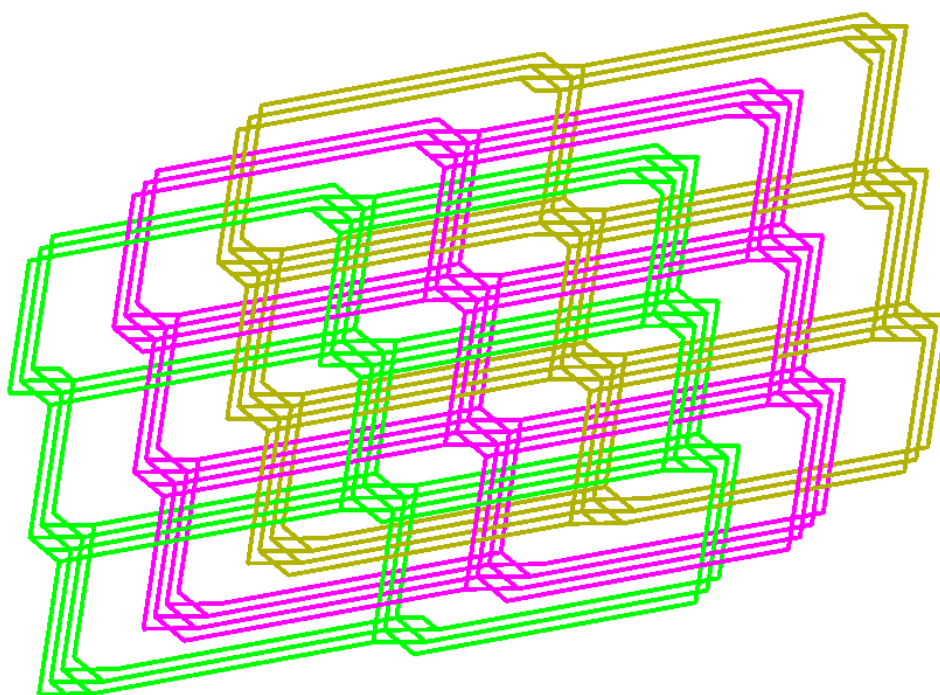

**(b)**

**Fig. S2.** The TGA curves of **1** - **3**.

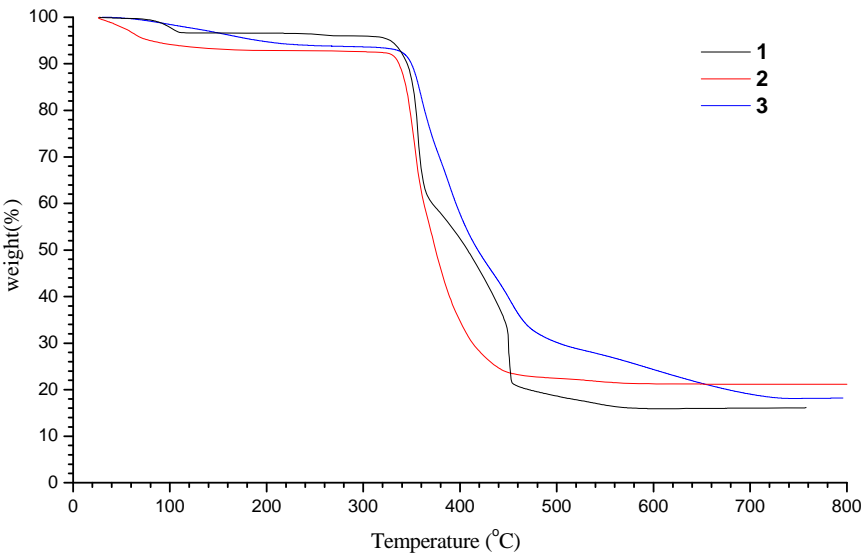

**Fig. S3.** The variable temperature powder XRD patterns of (a) **1** and (b) **2** and (c) **3**.

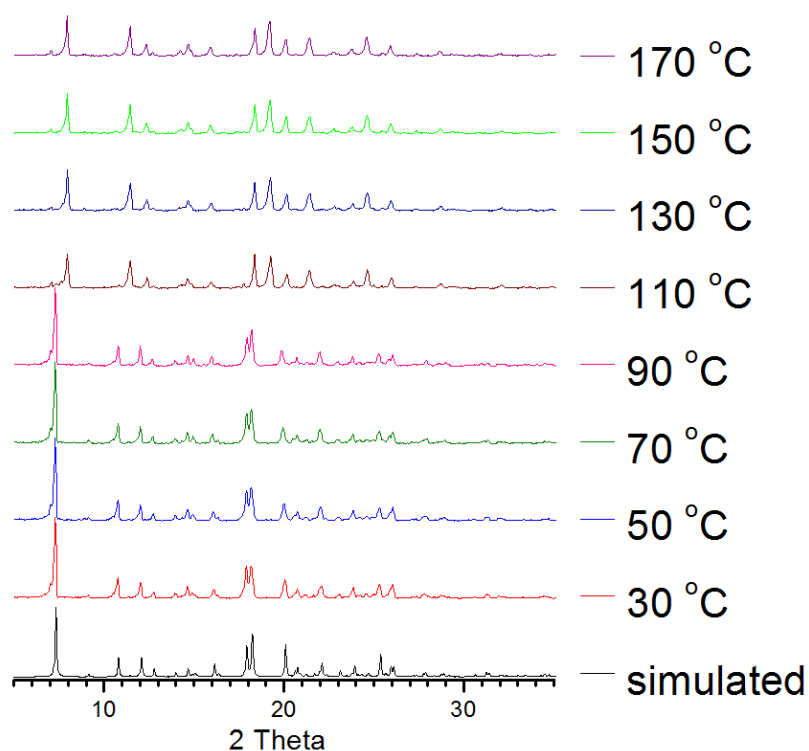

(a)

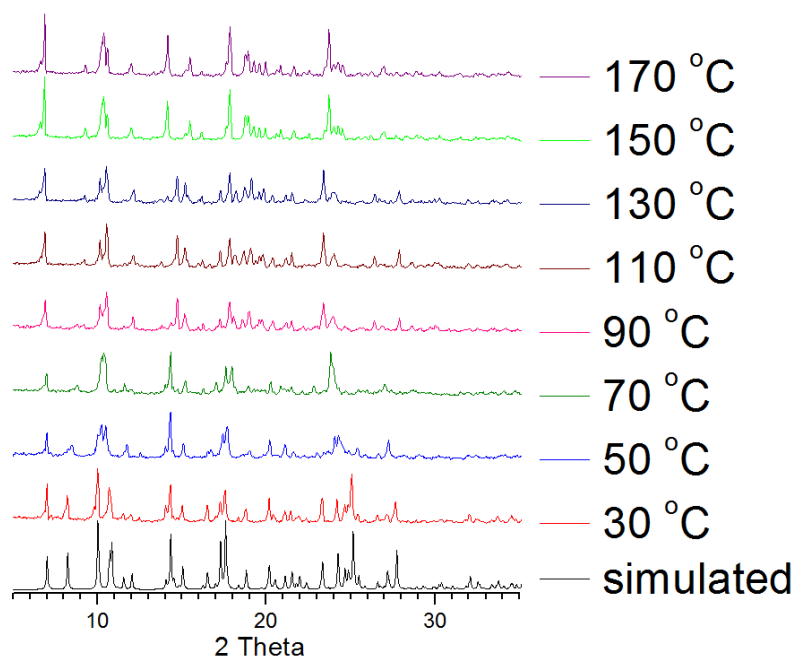

(b)

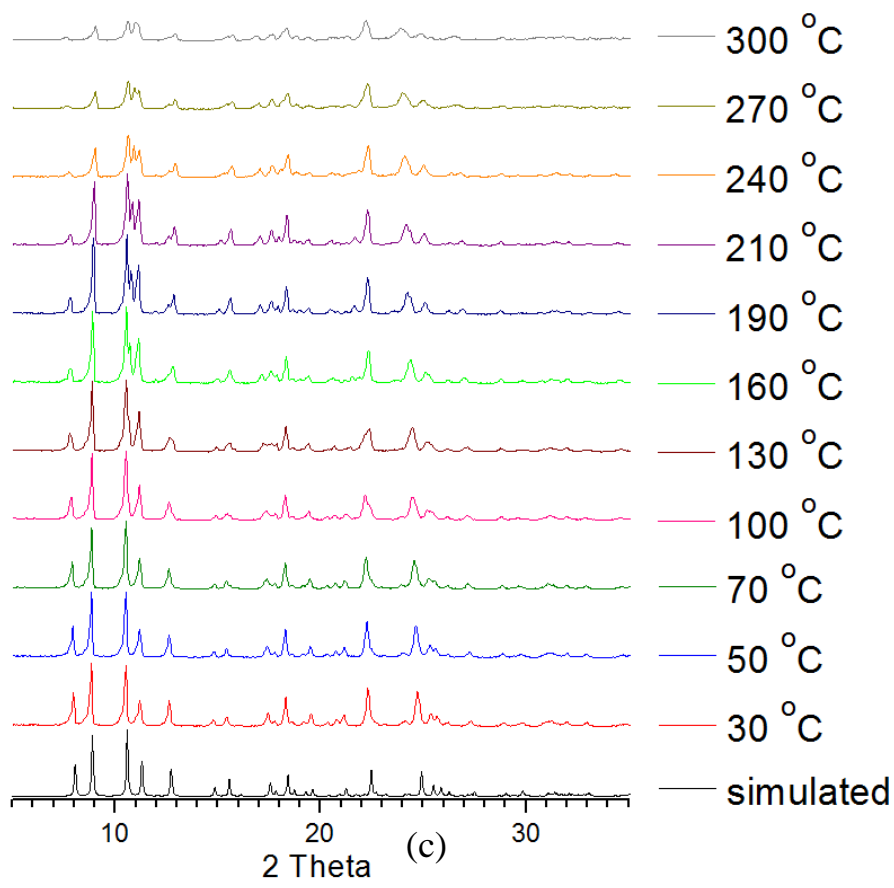

Supplement: c1ce06019h.pdf [file c1ce06019h.pdf]
